# Supplementary material for: Shifting and breaking scaling relations at transition metal telluride edges for selective electrochemical CO2 reduction
Source: Royal Society of Chemistry journal article supplement (doi:10.1039/d2ta00950a), 2022-01-01
Supplement: d2ta00950a1.pdf [file d2ta00950a1.pdf]

Online Supporting Information for

**Shifting and Breaking Scaling Relations at Transition Metal Telluride Edges  
for Selective Electrochemical CO<sub>2</sub> Reduction**

Courtney Brea<sup>1,2</sup>, Guoxiang Hu<sup>1,2,\*</sup>

<sup>1</sup>Department of Chemistry and Biochemistry, Queens College, City University of New York,  
New York, NY 11367, USA

<sup>2</sup>The Graduate Center, City University of New York, New York, NY 10016, USA

\*Corresponding author. Email: [guoxiang.hu@qc.cuny.edu](mailto:guoxiang.hu@qc.cuny.edu)

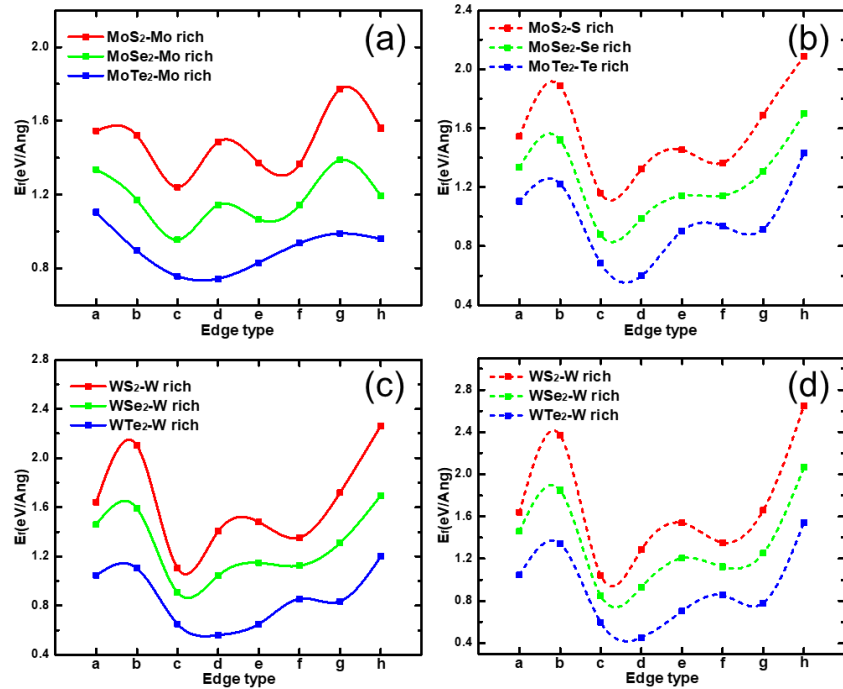

Fig. S1 Comparison of the formation energies for the edges under different chemical environments. (a) MoS<sub>2</sub>, MoSe<sub>2</sub>, and MoTe<sub>2</sub> in the Mo-rich condition, (b) MoS<sub>2</sub>, MoSe<sub>2</sub>, and MoTe<sub>2</sub> in the X-rich condition, (c) WS<sub>2</sub>, WSe<sub>2</sub>, and WTe<sub>2</sub> in the W-rich condition, and (d) WS<sub>2</sub>, WSe<sub>2</sub>, and WTe<sub>2</sub> in the X-rich condition.

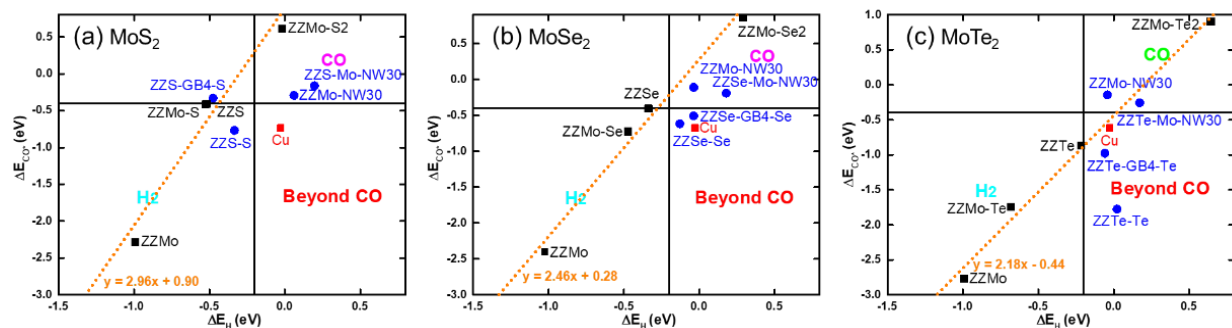

Fig. S2 The CO and H binding energies at the eight edges for (a) MoS<sub>2</sub>, (b) MoSe<sub>2</sub>, (c) MoTe<sub>2</sub>, where the CO binding energies were computed by using the RPBE functional.

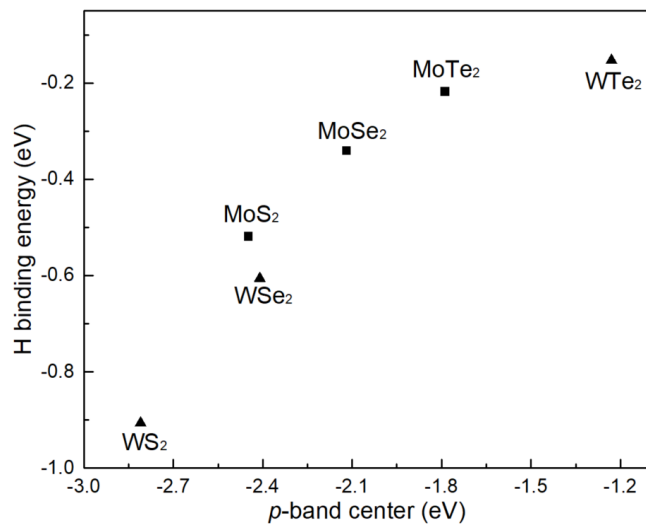

Fig. S3 The H binding energy and  $p$ -band center for the ZZ $X$  edge of six chemical compositions.

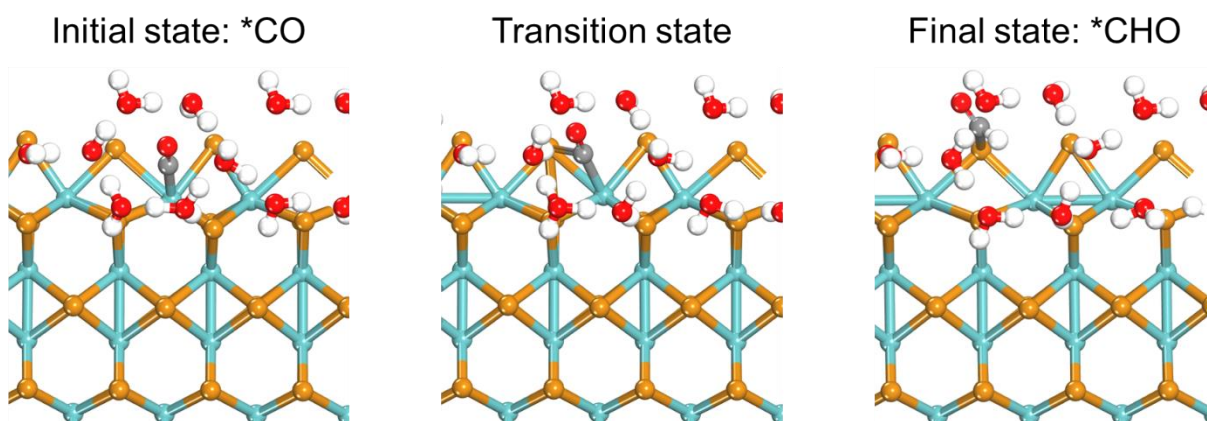

Fig. S4 The initial, transition, and final states for the proton-electron transfer to \*CO to form \*CHO at the ZZTe-GB4-Te edge of MoTe<sub>2</sub>. Mo, cyan; Te, brown; C, grey; O, red; H, white.

Table S1 The zero-point energy (ZPE) and entropy (TS) of reaction intermediates and free molecules for CO<sub>2</sub> reduction and HER at the ZZTe-GB4-Te edge.

|                          | <b>ZPE (eV)</b> | <b>-TS (eV)</b> |
|--------------------------|-----------------|-----------------|
| <b>CO<sub>2</sub></b>    | 0.31            | -0.66           |
| <b>COOH*</b>             | 0.63            | -0.22           |
| <b>H<sub>2</sub></b>     | 0.28            | -0.40           |
| <b>H<sub>2</sub>O</b>    | 0.57            | -0.67           |
| <b>CO*</b>               | 0.21            | -0.07           |
| <b>CHO*</b>              | 0.47            | -0.18           |
| <b>CH<sub>2</sub>O</b>   | 0.71            | -0.68           |
| <b>CH<sub>2</sub>OH*</b> | 1.11            | -0.19           |
| <b>CH<sub>3</sub>OH</b>  | 1.37            | -0.81           |
| <b>CH<sub>2</sub>*</b>   | 0.68            | -0.05           |
| <b>CH<sub>3</sub>*</b>   | 0.98            | -0.11           |
| <b>CH<sub>4</sub></b>    | 1.20            | -0.58           |
| <b>H*</b>                | 0.23            | -0.01           |
